# Supplementary material for: Predicting clinical decline and conversion to Alzheimer’s disease or dementia using novel Elecsys Aβ(1–42), pTau and tTau CSF immunoassays
Source: PubMed Central journal article supplement (PMC6911086; doi:10.1038/s41598-019-54204-z), 2019-12-13
Supplement: 41598_2019_54204_MOESM1_ESM.pdf [file 41598_2019_54204_MOESM1_ESM.pdf]

## Supplementary Materials

### **Predicting clinical decline and conversion to Alzheimer's disease or dementia using novel Elecsys A $\beta$ (1–42), pTau and tTau CSF immunoassays**

Kaj Blennow<sup>1,2,†</sup>, Leslie M. Shaw<sup>3,†</sup>, Erik Stomrud<sup>4,5</sup>, Niklas Mattsson<sup>4,6</sup>, Jon B. Toledo<sup>3,7</sup>, Katharina Buck<sup>8,‡</sup>, Simone Wahl<sup>8,‡</sup>, Udo Eichenlaub<sup>8</sup>, Valeria Lifke<sup>8</sup>, Maryline Simon<sup>9</sup>, John Q. Trojanowski<sup>3</sup> & Oskar Hansson<sup>4,5,\*</sup>

<sup>1</sup>Clinical Neurochemistry Laboratory, Sahlgrenska University Hospital, Mölndal, Sweden.

<sup>2</sup>Institute of Neuroscience and Physiology, Department of Psychiatry and Neurochemistry, The Sahlgrenska Academy at University of Gothenburg, Mölndal, Sweden. <sup>3</sup>Department of Pathology and Laboratory Medicine, University of Pennsylvania, Philadelphia, PA, USA.

<sup>4</sup>Clinical Memory Research Unit, Lund University, Malmö, Sweden. <sup>5</sup>Memory Clinic, Skåne University Hospital, Malmö, Sweden. <sup>6</sup>Wallenberg Center for Molecular Medicine, Lund University, Lund, Sweden. <sup>7</sup>Department of Neurology, Houston Methodist Hospital, Houston, TX, USA. <sup>8</sup>Roche Diagnostics GmbH, Penzberg, Germany. <sup>9</sup>Roche Diagnostics International Ltd, Rotkreuz, Switzerland.

†These authors contributed equally to the manuscript.

‡These authors completed the statistical analysis.

**\*Corresponding author:** Oskar Hansson

**Address:** Clinical Memory Research Unit, Lund University, Sweden

**Email:** [oskar.hansson@med.lu.se](mailto:oskar.hansson@med.lu.se)

**Telephone:** +46 72 226 77 45

**Fax:** +46 (0)46 222 4720

## Tables

**Supplementary Table S1.** Prediction of clinical decline assessed by model estimates for all covariates from baseline to 24 months according to the mixed-model of pTau/A $\beta$ (1–42) and outcome MMSE in the ADNI MCI and BioFINDER MCS populations.

| Study                           | Effect                          | Estimate | P value |
|---------------------------------|---------------------------------|----------|---------|
| ADNI                            | Intercept                       | 0.42     | 0.7731  |
|                                 | Visit (6 months)                | 9.38     | <0.0001 |
|                                 | Visit (12 months)               | 8.69     | <0.0001 |
|                                 | Visit (24 months)               | 6.52     | <0.0001 |
|                                 | BM+                             | 0.02     | 0.8823  |
|                                 | Visit (6 months)*BM+            | -1.00    | <0.0001 |
|                                 | Visit (6 months)*BM-            | 0.00     |         |
|                                 | Visit (12 months)*BM+           | -1.39    | <0.0001 |
|                                 | Visit (12 months)*BM-           | 0.00     |         |
|                                 | Visit (24 months)*BM+           | -2.08    | <0.0001 |
|                                 | Visit (24 months)*BM-           | 0.00     |         |
|                                 | Age                             | -0.01    | 0.2322  |
|                                 | Gender (female)                 | -0.09    | 0.4398  |
|                                 | Education                       | 0.04     | 0.0454  |
|                                 | MMSE_baseline*Visit (0 months)  | 0.99     | <0.0001 |
|                                 | MMSE_baseline*Visit (6 months)  | 0.65     | <0.0001 |
|                                 | MMSE_baseline*Visit (12 months) | 0.68     | <0.0001 |
| MMSE_baseline*Visit (24 months) | 0.75                            | <0.0001  |         |
| BioFINDER                       | Intercept                       | 0.32     | 0.8751  |
|                                 | Visit (12 months)               | 7.60     | 0.0006  |
|                                 | Visit (24 months)               | 1.09     | 0.6308  |
|                                 | BM+                             | 0.00     | 0.9941  |
|                                 | Visit (12 months)*BM+           | -1.23    | <0.0001 |
|                                 | Visit (12 months)*BM-           | 0.00     |         |
|                                 | Visit (24 months)*BM+           | -1.57    | <0.0001 |
|                                 | Visit (24 months)*BM-           | 0.00     |         |
|                                 | Age                             | 0.00     | 0.7723  |
|                                 | Gender (female)                 | 0.12     | 0.4276  |
|                                 | Education                       | 0.02     | 0.3706  |
|                                 | MMSE_baseline                   | 0.99     | <0.0001 |

|  |                                 |       |        |
|--|---------------------------------|-------|--------|
|  | MMSE_baseline*Visit (12 months) | -0.28 | 0.0003 |
|  | MMSE_baseline*Visit (24 months) | -0.07 | 0.4097 |

Analyses shown with adjustment for age, sex, years of education but without adjustment for APOE $\epsilon$ 4 status. pTau, phosphorylated Tau; MMSE, Mini-Mental State Examination; ADNI, Alzheimer's Disease Neuroimaging Initiative; MCI, mild cognitive impairment; MCS, mild cognitive symptoms; BM+, biomarker-positive; BM-, biomarker-negative.

**Supplementary Table S2.** Prediction of clinical decline assessed by change in clinical scores in CDR-SB (ADNI only), FAQ and ADAS-cog (ADNI only) from baseline to 24 months according to CSF biomarker status, in the ADNI MCI and BioFINDER MCS populations.

| Clinical score | Biomarker             | Change in score, BM-positive, estimate (95% CI) |           | Change in score, BM-negative, estimate (95% CI) |           | Difference between change in score, BM-negative and BM-positive, estimate (95% CI) |           |
|----------------|-----------------------|-------------------------------------------------|-----------|-------------------------------------------------|-----------|------------------------------------------------------------------------------------|-----------|
|                |                       | ADNI                                            | BioFINDER | ADNI                                            | BioFINDER | ADNI                                                                               | BioFINDER |
| <b>CDR-SB</b>  | pTau/A $\beta$ (1–42) | 1.50<br>(1.36 to 1.64)                          |           | 0.16<br>(0.01 to 0.31)                          |           | 1.34<br>(1.13 to 1.55)                                                             |           |
|                | tTau/A $\beta$ (1–42) | 1.51<br>(1.37 to 1.65)                          |           | 0.14<br>(–0.01 to 0.30)                         |           | 1.37<br>(1.16 to 1.58)                                                             |           |
|                | A $\beta$ (1–42)      | 1.36<br>(1.23 to 1.49)                          |           | 0.19<br>(0.03 to 0.36)                          |           | 1.17<br>(0.95 to 1.38)                                                             |           |
|                | pTau                  | 1.47<br>(1.31 to 1.63)                          |           | 0.48<br>(0.34 to 0.62)                          |           | 1.00<br>(0.78 to 1.21)                                                             |           |
|                | tTau                  | 1.46<br>(1.29 to 1.64)                          |           | 0.56<br>(0.43 to 0.69)                          |           | 0.90<br>(0.68 to 1.12)                                                             |           |

|                 |                       |                        |                        |                          |                        |                        |                         |
|-----------------|-----------------------|------------------------|------------------------|--------------------------|------------------------|------------------------|-------------------------|
| <b>FAQ</b>      | pTau/A $\beta$ (1–42) | 4.54<br>(4.08 to 4.99) | 4.83<br>(4.01 to 5.66) | 0.84<br>(0.34 to 1.34)   | 2.31<br>(1.59 to 3.03) | 3.70<br>(3.01 to 4.38) | 2.52<br>(1.42 to 3.62)  |
|                 | tTau/A $\beta$ (1–42) | 4.56<br>(4.11 to 5.01) | 4.83<br>(4.01 to 5.66) | 0.79<br>(0.28 to 1.29)   | 2.31<br>(1.59 to 3.03) | 3.78<br>(3.09 to 4.46) | 2.52<br>(1.42 to 3.62)  |
|                 | A $\beta$ (1–42)      | 4.25<br>(3.81 to 4.68) | 4.35<br>(3.58 to 5.11) | 0.80<br>(0.27 to 1.33)   | 2.43<br>(1.65 to 3.21) | 3.45<br>(2.75 to 4.14) | 1.92<br>(0.82 to 3.01)  |
|                 | pTau                  | 4.57<br>(4.05 to 5.09) | 4.19<br>(3.19 to 5.20) | 1.63<br>(1.19 to 2.07)   | 3.07<br>(2.41 to 3.72) | 2.94<br>(2.25 to 3.63) | 1.13<br>(–0.07 to 2.33) |
|                 | tTau                  | 4.69<br>(4.14 to 5.24) | 4.40<br>(3.42 to 5.38) | 1.78<br>(1.35 to 2.20)   | 2.95<br>(2.29 to 3.61) | 2.91<br>(2.21 to 3.60) | 1.45<br>(0.26 to 2.63)  |
| <b>ADAS-cog</b> | pTau/A $\beta$ (1–42) | 3.98<br>(3.37 to 4.58) |                        | –0.12<br>(–0.82 to 0.58) |                        | 4.09<br>(3.13 to 5.06) |                         |
|                 | tTau/A $\beta$ (1–42) | 3.99<br>(3.39 to 4.60) |                        | –0.17<br>(–0.87 to 0.53) |                        | 4.16<br>(3.20 to 5.12) |                         |

|  |                  |                           |  |                            |  |                           |  |
|--|------------------|---------------------------|--|----------------------------|--|---------------------------|--|
|  | A $\beta$ (1–42) | 3.54<br>(2.97 to<br>4.12) |  | 0.04<br>(–0.70 to<br>0.79) |  | 3.50<br>(2.53 to<br>4.47) |  |
|  | pTau             | 4.00<br>(3.31 to<br>4.69) |  | 0.81<br>(0.21 to<br>1.41)  |  | 3.19<br>(2.24 to<br>4.13) |  |
|  | tTau             | 3.79<br>(3.06 to<br>4.52) |  | 1.22<br>(0.65 to<br>1.79)  |  | 2.57<br>(1.62 to<br>3.52) |  |

Based on PET-optimised cut-offs for A $\beta$ (1–42), pTau/A $\beta$ (1–42) and tTau/A $\beta$ (1–42). Analyses shown with adjustment for age, sex, years of education but without adjustment for *APOE* $\epsilon$ 4 status. CDR-SB, Clinical Dementia Rating Scale Sum of Boxes; ADNI, Alzheimer's Disease Neuroimaging Initiative; FAQ, Functional Activities Questionnaire; ADAS-cog, Alzheimer's Disease Assessment Scale-cognitive; CSF, cerebrospinal fluid; MCI, mild cognitive impairment; MCS, mild cognitive symptoms; BM, biomarker; CI, confidence interval; pTau, phosphorylated Tau; tTau, total Tau; PET, positron emission tomography.

**Supplementary Table S3.** Prediction of clinical decline assessed by change in MMSE, CDR-SB, FAQ and ADAS-cog clinical scores from baseline to 24 months according to CSF biomarker status, in the ADNI MCI population.

| Clinical score  | Biomarker             | Change in score, BM-positive, estimate (95% CI) | Change in score, BM-negative, estimate (95% CI) | Difference between change in score, BM-negative and BM-positive, estimate (95% CI) |
|-----------------|-----------------------|-------------------------------------------------|-------------------------------------------------|------------------------------------------------------------------------------------|
| <b>MMSE</b>     | pTau/A $\beta$ (1–42) | –2.25 (–2.51 to –1.98)                          | –0.08 (–0.36 to 0.20)                           | –2.17 (–2.56 to –1.77)                                                             |
|                 | tTau/A $\beta$ (1–42) | –2.32 (–2.59 to –2.04)                          | –0.13 (–0.40 to 0.14)                           | –2.19 (–2.58 to –1.79)                                                             |
|                 | A $\beta$ (1–42)      | –2.04 (–2.30 to –1.78)                          | –0.25 (–0.53 to 0.04)                           | –1.79 (–2.19 to –1.40)                                                             |
| <b>CDR-SB</b>   | pTau/A $\beta$ (1–42) | 1.59 (1.44 to 1.73)                             | 0.17 (0.02 to 0.32)                             | 1.42 (1.21 to 1.62)                                                                |
|                 | tTau/A $\beta$ (1–42) | 1.62 (1.47 to 1.76)                             | 0.21 (0.07 to 0.35)                             | 1.41 (1.20 to 1.62)                                                                |
|                 | A $\beta$ (1–42)      | 1.41 (1.27 to 1.55)                             | 0.31 (0.16 to 0.46)                             | 1.10 (0.89 to 1.31)                                                                |
| <b>FAQ</b>      | pTau/A $\beta$ (1–42) | 4.80 (4.33 to 5.26)                             | 0.84 (0.36 to 1.32)                             | 3.96 (3.28 to 4.64)                                                                |
|                 | tTau/A $\beta$ (1–42) | 4.94 (4.46 to 5.41)                             | 0.93 (0.46 to 1.39)                             | 4.01 (3.33 to 4.69)                                                                |
|                 | A $\beta$ (1–42)      | 4.46 (4.00 to 4.92)                             | 1.09 (0.60 to 1.57)                             | 3.37 (2.70 to 4.05)                                                                |
| <b>ADAS-cog</b> | pTau/A $\beta$ (1–42) | 4.20 (3.57 to 4.84)                             | –0.08 (–0.76 to 0.60)                           | 4.28 (3.30 to 5.26)                                                                |
|                 | tTau/A $\beta$ (1–42) | 4.47 (3.83 to 5.12)                             | –0.09 (–0.75 to 0.56)                           | 4.57 (3.60 to 5.53)                                                                |
|                 | A $\beta$ (1–42)      | 3.72 (3.11 to 4.33)                             | 0.39 (–0.29 to 1.06)                            | 3.33 (2.39 to 4.27)                                                                |

Based on pre-specified cut-offs adjusted for pre-analytical handling: A $\beta$ (1–42), 880 pg/mL; pTau/A $\beta$ (1–42), 0.028; tTau/A $\beta$ (1–42), 0.33. Analyses shown with adjustment for age, sex, years of education but without adjustment for APOE $\epsilon$ 4 status. MMSE, Mini-Mental State Examination; CDR-SB, Clinical Dementia Rating Scale Sum of Boxes; FAQ, Functional Activities Questionnaire; ADAS-cog, Alzheimer’s Disease Assessment Scale-cognitive; CSF, cerebrospinal fluid; ADNI, Alzheimer’s Disease Neuroimaging Initiative; MCI, mild cognitive impairment; BM, biomarker; CI, confidence interval; pTau, phosphorylated Tau; tTau, total Tau.

## Figures

**Supplementary Figure S1.** Difference of model-derived least square-means (with 95% CI) in MMSE score change from baseline to 24 months according to CSF biomarker status, in the ADNI MCI and BioFINDER MCS populations.

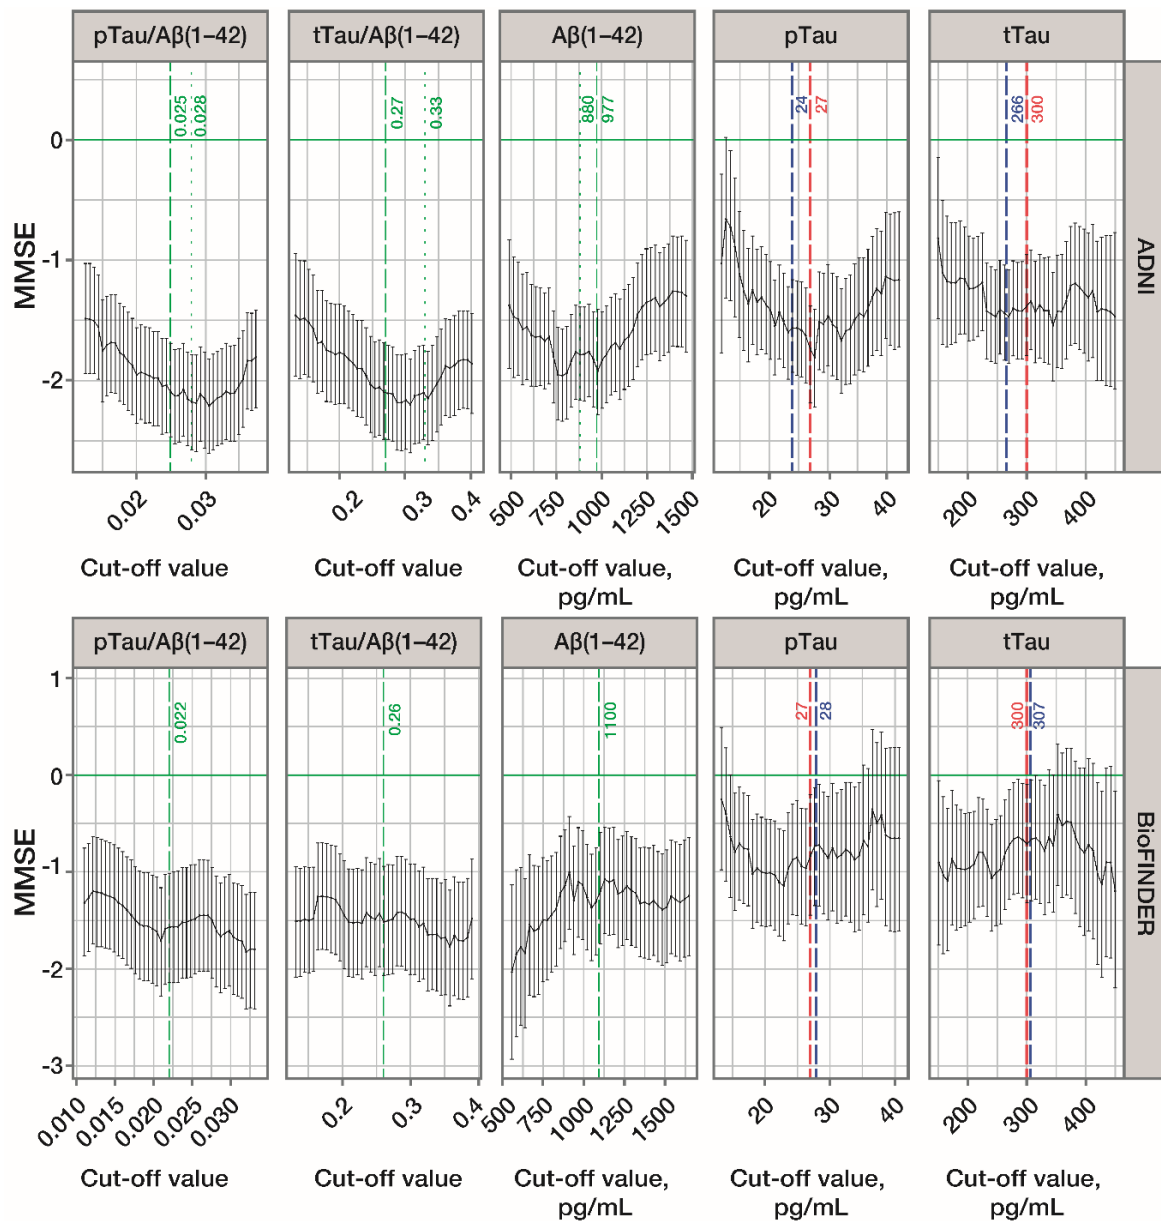

Vertical lines represent the cut-offs (dashed, optimised in respective cohort; dotted, pre-specified; green, optimised for PET concordance; red, determined using progression data; blue, optimised for AD *versus* controls); ADNI (upper panel) and BioFINDER (lower panel). Analyses shown with adjustment for age, sex, years of education but without adjustment for  $APOE\epsilon_4$  status. CI, confidence interval; MMSE, Mini-Mental State Examination; CSF, cerebrospinal fluid; ADNI, Alzheimer's Disease Neuroimaging Initiative; MCI, mild cognitive impairment; MCS, mild cognitive symptoms; pTau, phosphorylated Tau; tTau, total Tau; PET, positron emission tomography; AD, Alzheimer's disease.



**Supplementary Figure S2.** Difference of least square-means in change in (a) CDR-SB (ADNI MCI only), (b) FAQ (ADNI MCI and BioFINDER MCS) clinical scores from baseline to 24 months according to CSF biomarker status.

**a**

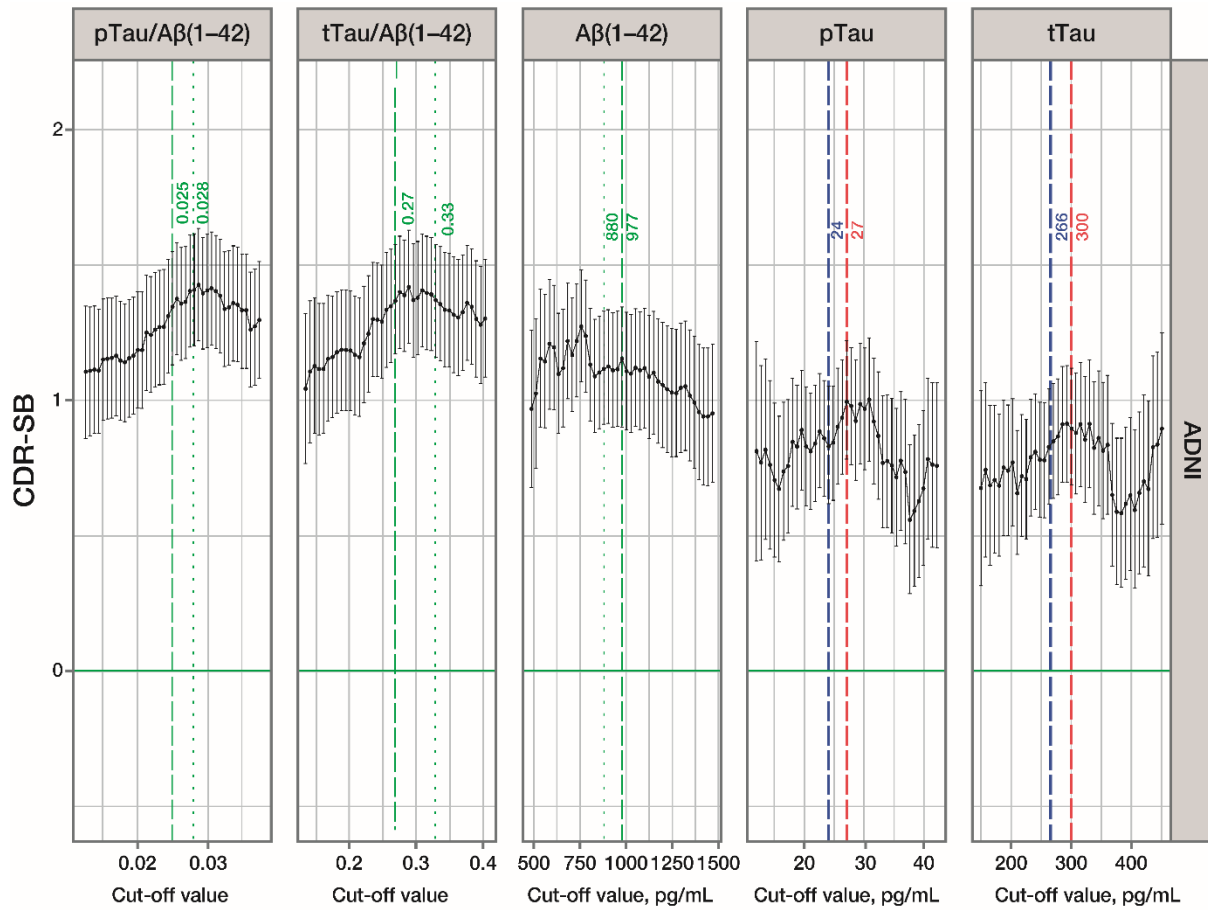

b

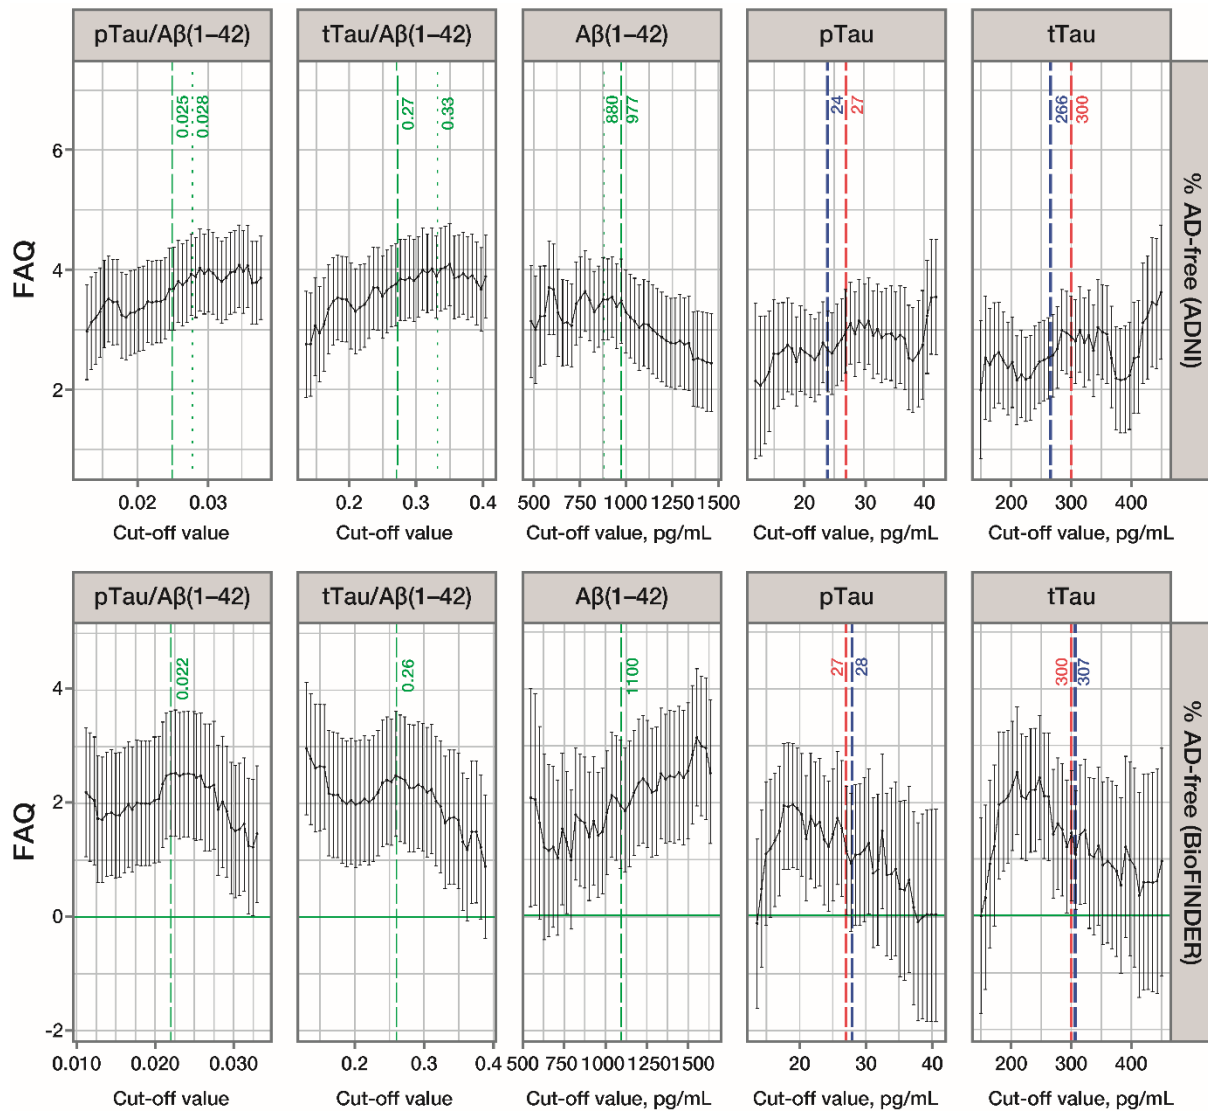

Vertical lines represent the cut-offs (dashed: optimised in respective cohort; dotted: pre-specified; green: optimised for PET concordance; red: determined using progression data; blue: optimised for AD versus controls). Analyses shown with adjustment for age, sex, years of education but without adjustment for *APOE* $\epsilon$ 4 status. CDR-SB, Clinical Dementia Rating Sum of Boxes; ADNI, Alzheimer's Disease Neuroimaging Initiative; MCI, mild cognitive impairment; FAQ, Functional Activities Questionnaire; MCS, mild cognitive symptoms; CSF, cerebrospinal fluid; pTau, phosphorylated Tau; tTau, total Tau; AD, Alzheimer's disease; PET, positron emission tomography.

**Supplementary Figure S3.** Cut-off grid derived hazard ratios (with 95% CIs) for outcome time to dementia according to CSF biomarkers (pTau/A $\beta$ (1–42), tTau/A $\beta$ (1–42), A $\beta$ (1–42), pTau, tTau), in the ADNI MCI (upper panel) and BioFINDER MCS (lower panel) populations.

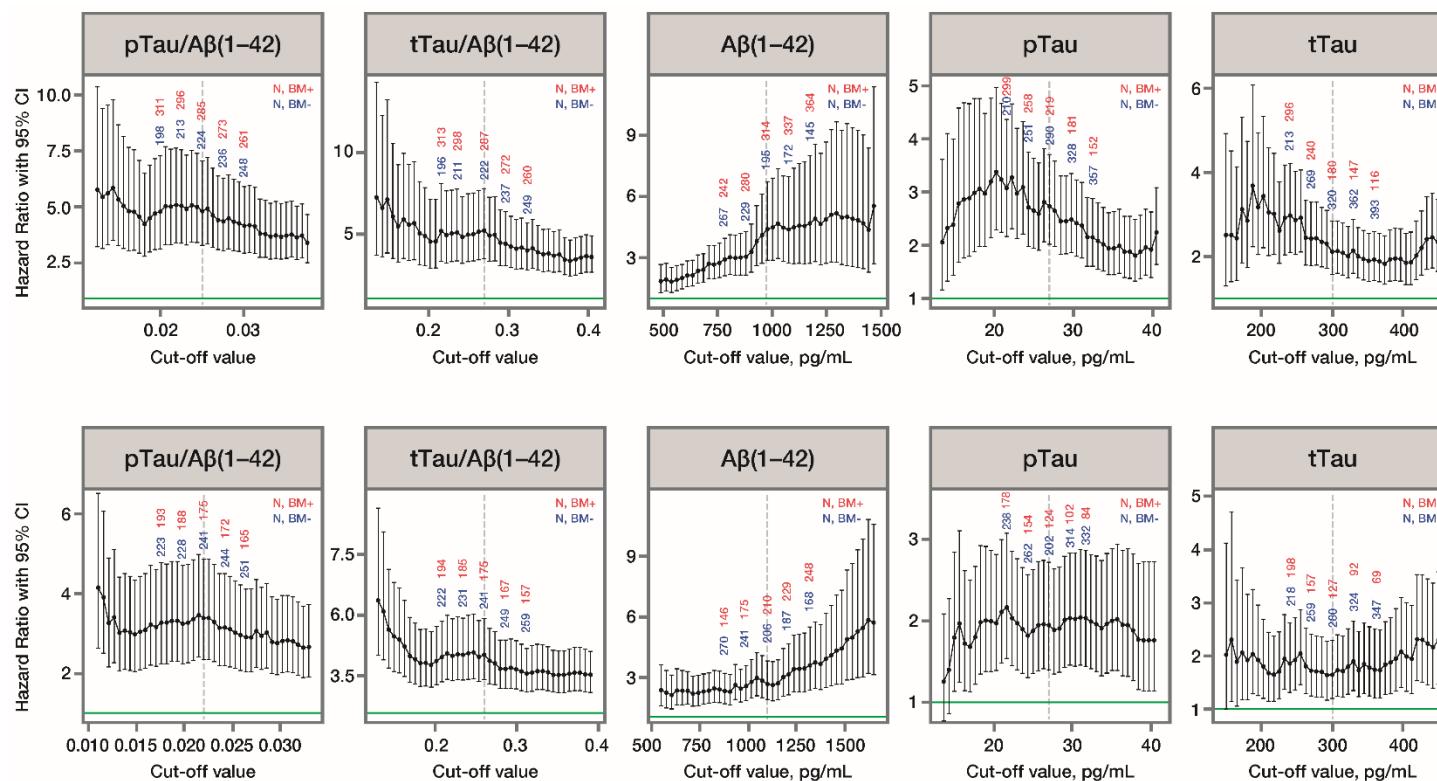

Analyses shown with adjustment for age, sex, years of education, baseline MMSE score, baseline CDR-SB score (ADNI only), but without adjustment for *APOE* $\epsilon$ 4 status. CI, confidence interval; CSF, cerebrospinal fluid; pTau, phosphorylated Tau; tTau, total Tau; ADNI, Alzheimer's Disease Neuroimaging Initiative; MCI, mild cognitive impairment; MCS, mild cognitive symptoms; BM+, biomarker-positive; BM–, biomarker-negative; MMSE, Mini-Mental State Examination; CDR-SB, Clinical Dementia Rating Sum of Boxes.

**Supplementary Figure S4.** Model-derived time-course plots (least square-means with SEs) of (a) FAQ (ADNI MCI and BioFINDER MCS populations), (b) CDR-SB (ADNI MCI only) and (c) ADAS-cog (ADNI MCI only) clinical scores from baseline to 24 months according to CSF biomarker status; number of patients in each biomarker group at baseline is presented.

a

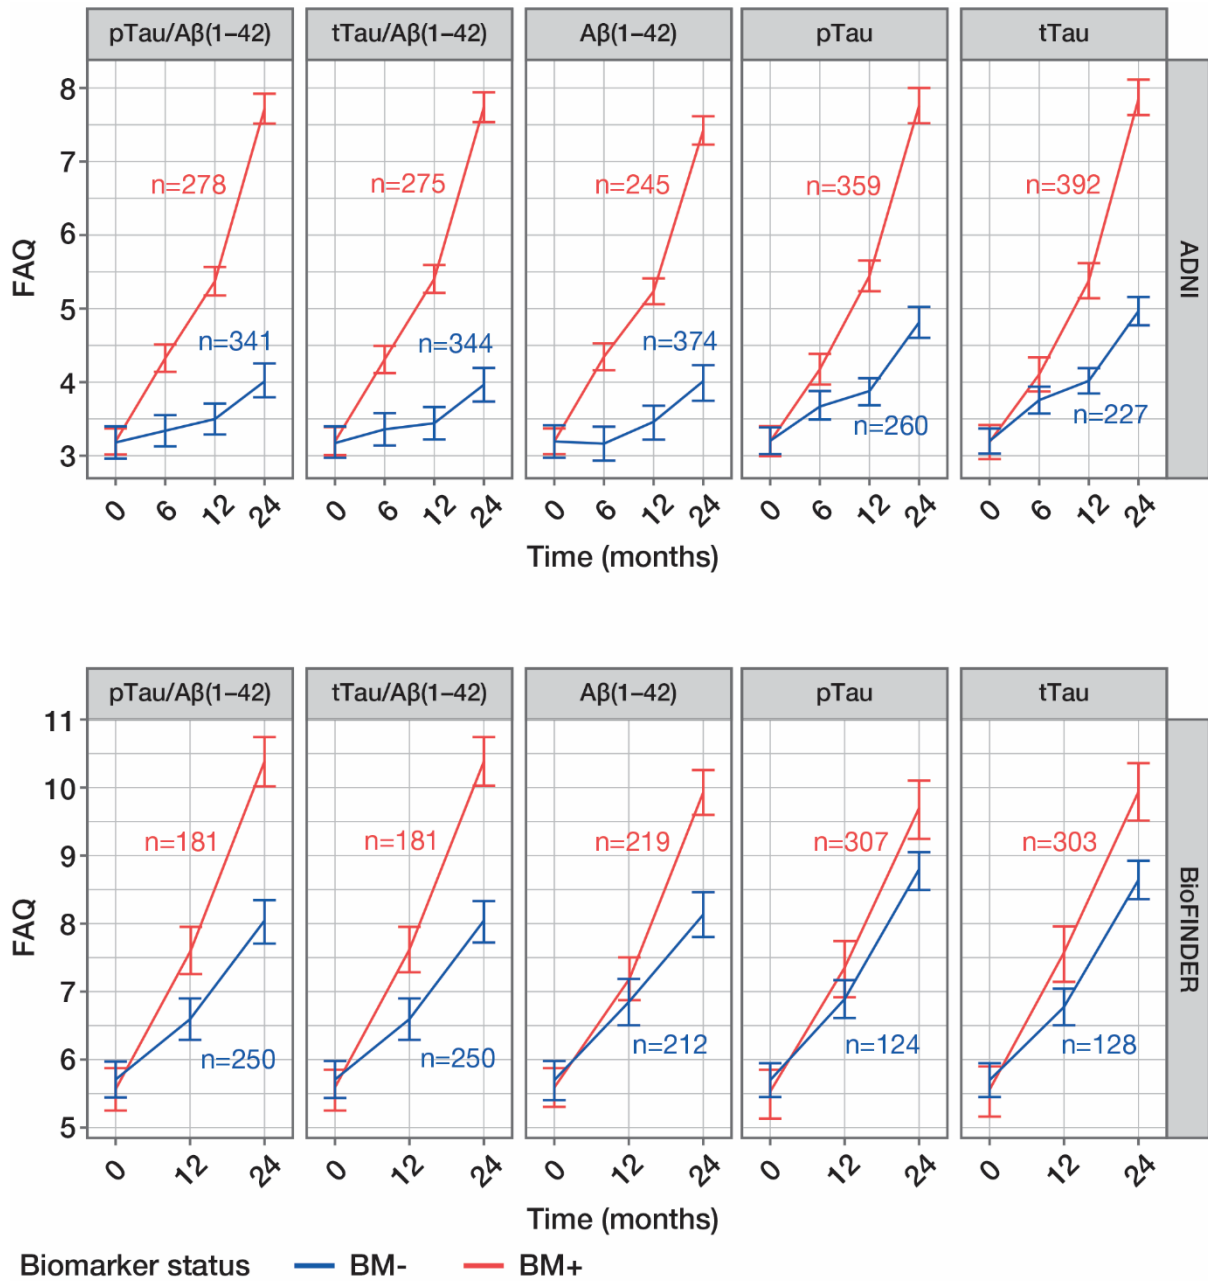

**b**

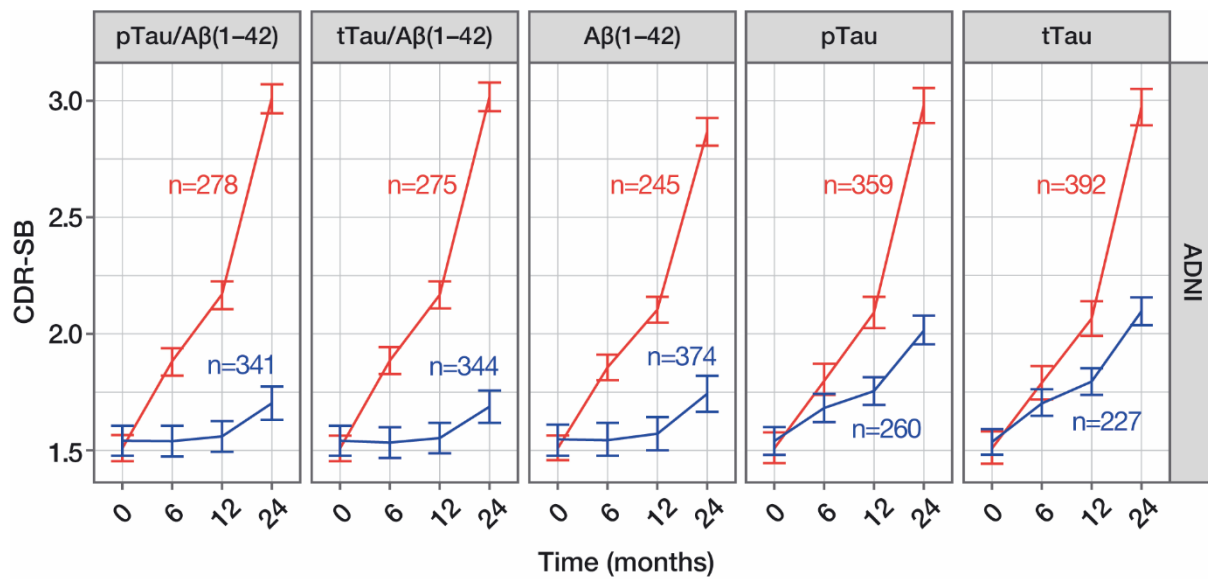

**c**

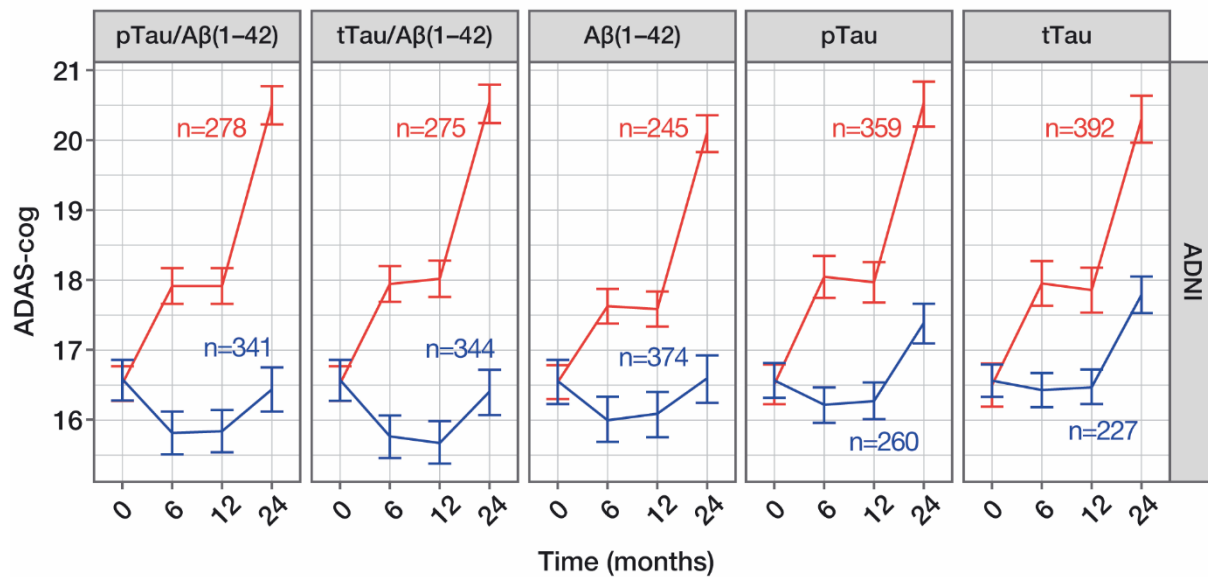

Biomarker status — BM- — BM+

Based on PET-optimised cut-offs for Aβ(1-42), pTau/Aβ(1-42) and tTau/Aβ(1-42). Analyses shown with adjustment for age, sex, years of education but without adjustment for APOEε4 status. SE, standard error; FAQ, Functional Activities Questionnaire; ADNI, Alzheimer's Disease Neuroimaging Initiative; MCI, mild cognitive impairment; MCS, mild cognitive symptoms; CDR-SB, Clinical Dementia Rating Sum of Boxes; ADAS-cog, Alzheimer's Disease Assessment Scale-cognitive; CSF, cerebrospinal fluid; pTau, phosphorylated Tau; tTau, total Tau; BM-, biomarker-negative; BM+, biomarker-positive; PET, positron emission tomography.

**Supplementary Figure S5.** Model-derived time-course plots (least square-means with SEs) of MMSE score from baseline to 24 months according to biomarker status, in the ADNI MCI population; number of patients in each biomarker group at baseline is presented.

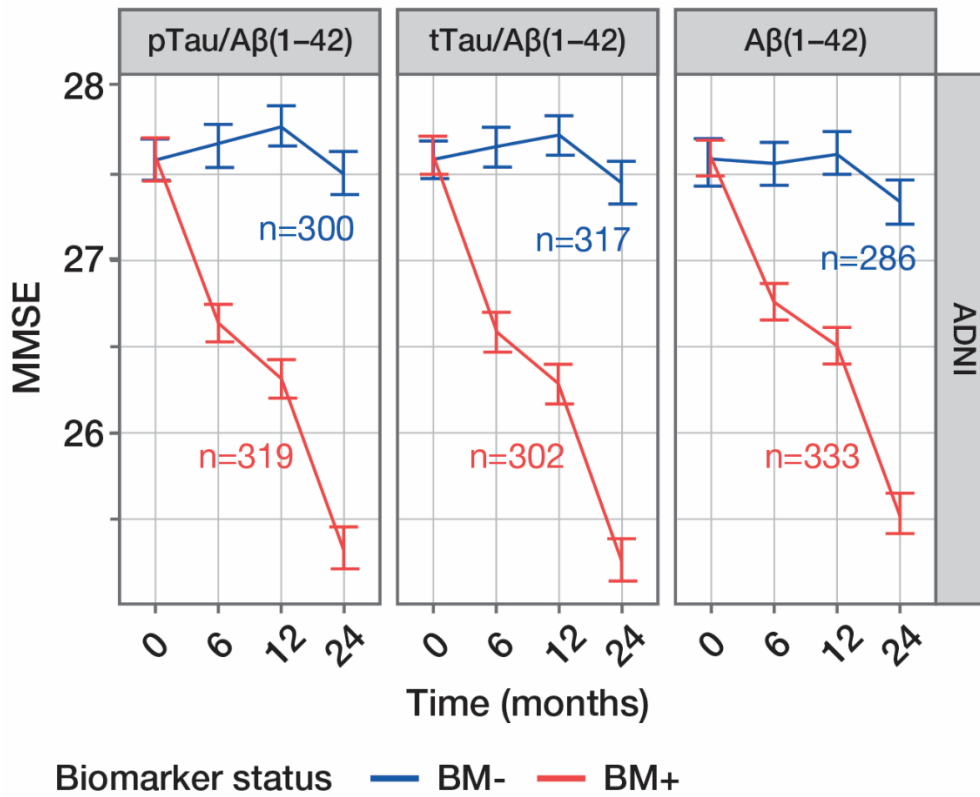

Based on pre-specified, adjusted cut-offs for Aβ(1-42), 880 pg/mL; pTau/Aβ(1-42), 0.028; tTau/Aβ(1-42), 0.33. SE, standard error; MMSE, Mini-Mental State Examination; ADNI, Alzheimer's Disease Neuroimaging Initiative; MCI, minimal cognitive impairment; pTau, phosphorylated Tau; tTau, total Tau; BM-, biomarker-negative; BM+, biomarker-positive.

**Supplementary Figure S6.** Model-derived time-course plots (least square-means with SE) of MMSE score from baseline to 24 months according to pTau and pTau/A $\beta$ (1–42) status in the (a) ADNI MCI and (c) BioFINDER MCS populations; number of patients in each biomarker group at baseline is presented. Kaplan-Meier plots of outcome dementia diagnosis within 6 years of follow-up according to pTau and pTau/A $\beta$ (1–42) status in the (b) ADNI MCI and (d) BioFINDER MCS populations; number of patients in each biomarker group at each time point is presented.

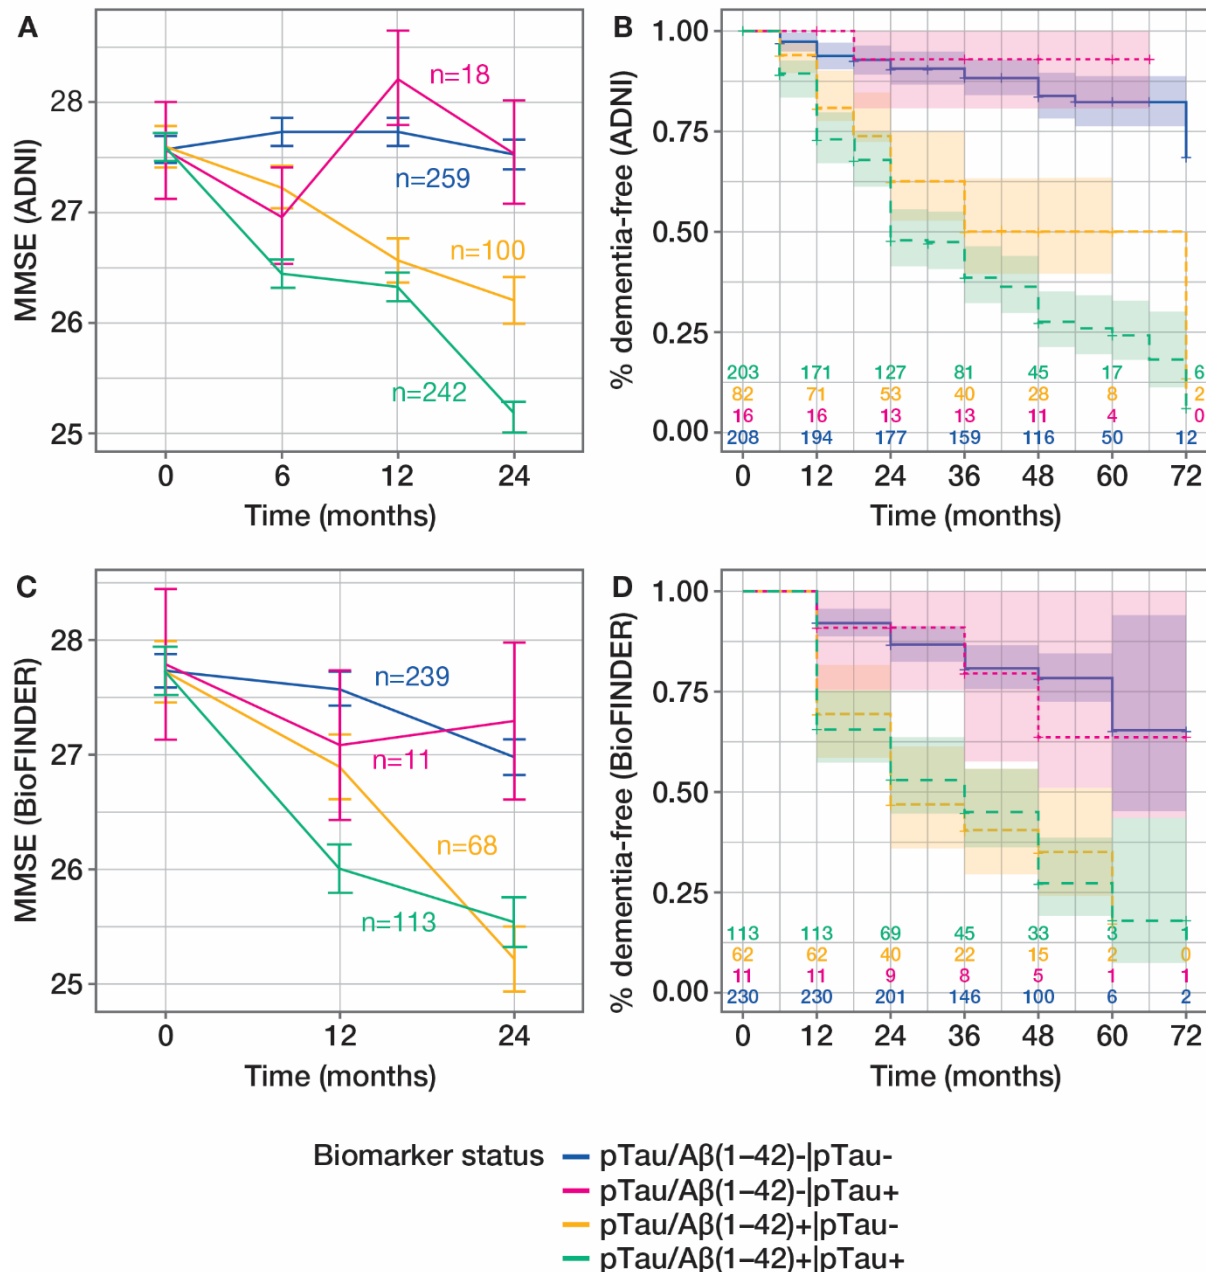

Mixed-model analyses (a, c) shown with adjustment for age, sex, years of education but without adjustment for *APOE $\epsilon$ 4* status. SE, standard error; MMSE, Mini-Mental State Examination; pTau, phosphorylated Tau; ADNI, Alzheimer's Disease Neuroimaging Initiative; MCI, mild cognitive impairment; MCS, mild cognitive symptoms.

**Supplementary Figure S7.** Model-derived time-course plots (least square-means with SE) of MMSE score from baseline to 24 months according to pTau and visual PET status in the (a) ADNI MCI and (c) BioFINDER MCS populations; number of patients in each biomarker group at baseline is presented. Kaplan-Meier plots of outcome dementia diagnosis within 6 years of follow-up according to pTau and visual PET status in the (b) ADNI MCI and (d) BioFINDER MCS populations; number of patients in each biomarker group at each time point is presented.

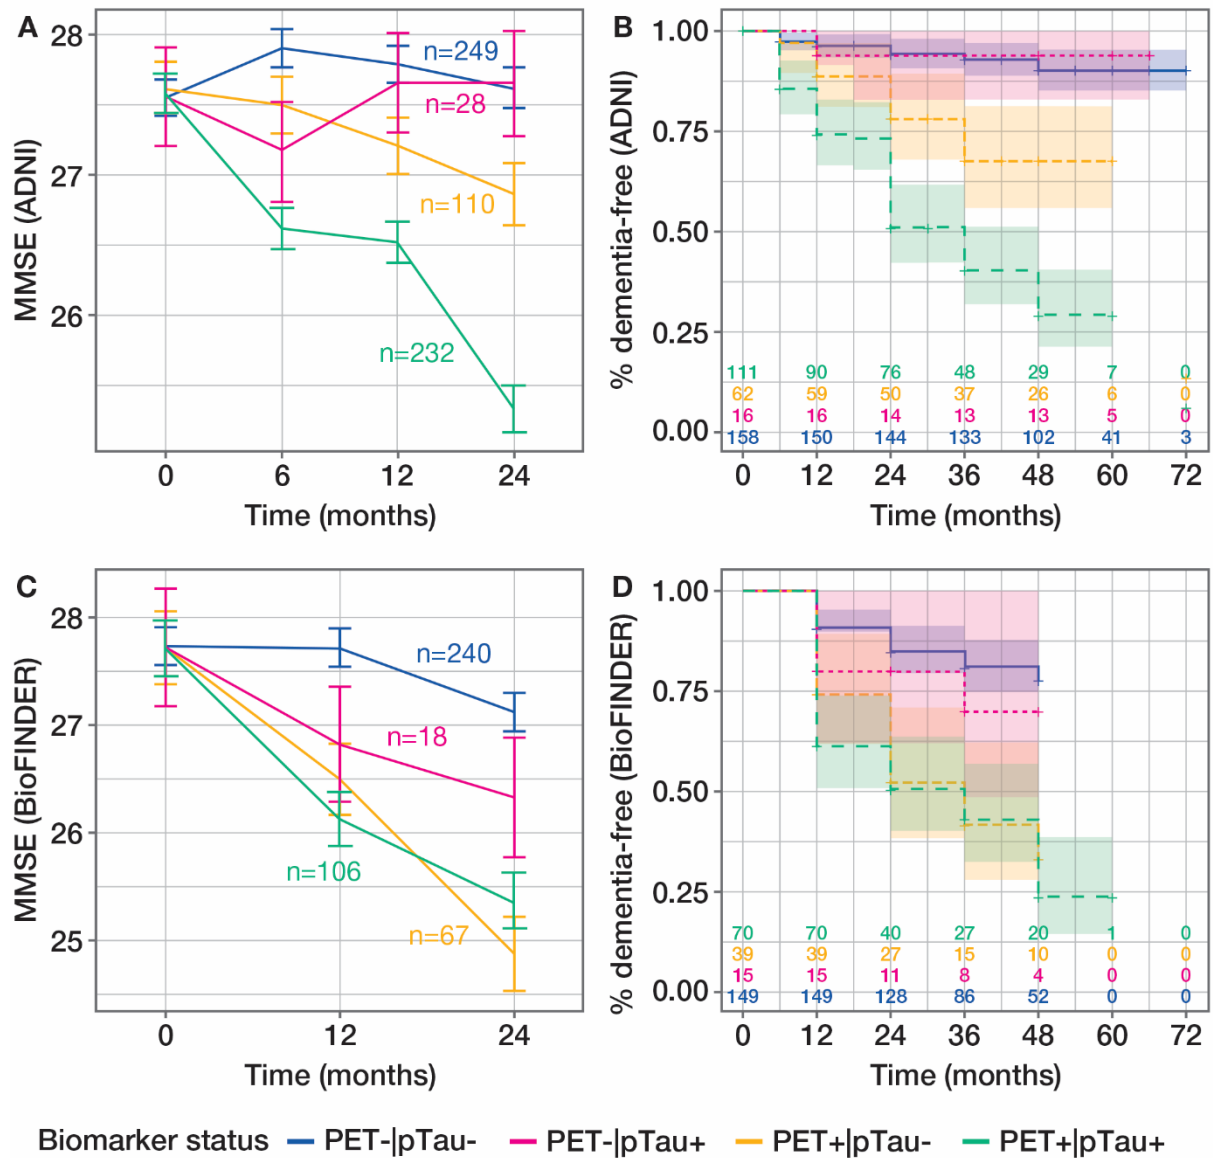

Mixed-model analyses (a, c) shown with adjustment for age, sex, years of education but without adjustment for *APOEε4* status. SE, standard error; MMSE, Mini-Mental State Examination; pTau, phosphorylated Tau; PET, positron emission tomography; ADNI, Alzheimer's Disease Neuroimaging Initiative; MCI, mild cognitive impairment; MCS, mild cognitive symptoms.
